# Supplementary material for: Separation and Determination of Chemopreventive Phytochemicals of Flavonoids from Brassicaceae Plants
Source: MDPI journal article supplement (doi:10.3390/molecules26164734), 2021-08-05
Supplement: s1 [file s1]

**Table S1.** Content of the polyphenols in *Brassicaceae* plants extracts

| No sample     | 1    | 2    | 3    | 4    | 5    | 6    | 7    | 8    | 9    | 10   | 11   | 12   | 13   | 14   | 15   | 16   | 17   | 18    | 19   | 20   | 21   | 22   | 23   | 24   | 25   |
|---------------|------|------|------|------|------|------|------|------|------|------|------|------|------|------|------|------|------|-------|------|------|------|------|------|------|------|
| RUT           | <LOD | <LOQ | <LOD | 178  | <LOQ | <LOQ | <LOD | <LOQ | <LOQ | <LOD | <LOD | 0.42 | <LOQ | 0.52 | <LOQ | <LOD | <LOD | <LOQ  | <LOQ | <LOD | <LOQ | <LOQ | <LOD | <LOD | 0.74 |
| QUE           | <LOQ | <LOQ | <LOQ | <LOQ | <LOQ | 1.05 | <LOQ | <LOQ | <LOQ | <LOQ | <LOQ | <LOQ | 0.94 | 0.92 | 1.56 | <LOQ | <LOQ | 61.19 | <LOQ | <LOQ | <LOQ | <LOQ | 20.9 | <LOQ | <LOQ |
| NAR           | 1.05 | 0.65 | 1.88 | 0.55 | <LOQ | 0.40 | <LOQ | <LOQ | 0.86 | <LOQ | 0.67 | <LOQ | <LOQ | <LOQ | 2.00 | <LOQ | ND   | <LOQ  | <LOQ | <LOQ | ND   | <LOQ | 1.31 | 0.82 | <LOQ |
| TAX           | <LOQ | ND   | ND   | <LOQ | 0.52 | 0.42 | <LOQ | 0.44 | ND   | ND   | <LOQ | <LOQ | 0.41 | <LOQ | 1.15 | <LOQ | ND   | 0.42  | 1.03 | <LOQ | ND   | <LOQ | 3.39 | 0.41 | 0.58 |
| ERC           | 4.46 | 3.53 | 1.81 | 6.54 | 0.71 | ND    | ND   | ND   | ND   | ND   | ND   | ND   | ND   |
| ERI           | <LOQ | <LOQ | <LOQ | <LOQ | <LOQ | <LOQ | ND   | 0.79 | <LOQ | <LOQ | <LOQ | <LOQ | <LOQ | 0.73 | 0.71 | ND   | ND   | ND    | ND   | <LOQ | <LOQ | ND   | 0.97 | <LOQ | <LOQ |
| 3-HBA         | 0.45 | 7.20 | 0.78 | 1.63 | 0.40 | <LOQ | <LOQ | <LOQ | 0.50 | <LOQ | 0.83  | 0.44 | <LOQ | <LOQ | 1.64 | 0.40 | <LOQ | 0.54 |
| BA            | 0.64 | 1.32 | 2.98 | 2.30 | 0.61 | 2.03 | 1.24 | 3.23 | 0.87 | 1.44 | 2.21 | 0.82 | 0.99 | 0.67 | 2.43 | ND   | ND   | 1.78  | 1.23 | 1.73 | ND   | ND   | 0.63 | 1.01 | ND   |
| CA            | 0.66 | ND   | ND   | ND   | ND   | 0.40 | ND    | ND   | ND   | ND   | ND   | ND   | ND   | ND   |
| 3,4-DHBA      | 0.70 | 222  | 15.7 | 259  | 37.4 | 60.1 | 31.9 | 42.2 | 41.6 | 41.1 | 42.1 | 48.9 | 82.4 | 121  | 161  | 51.6 | 99.1 | 31.3  | 16.3 | 71.7 | 63.9 | 47.3 | 1167 | 61.9 | 45.3 |
| 4-HBA         | 295  | 4054 | 1478 | 863  | 121  | 1516 | 291  | 619  | 25.5 | 139  | 349  | 222  | 142  | 495  | 462  | 72.7 | 53.2 | 317   | 270  | 1306 | 169  | 110  | 215  | 111  | 114  |
| 3,4-HPPA      | 953  | 1346 | 868  | 65.3 | 75.5 | 92.9 | 70.7 | 36.5 | 527  | 194  | 123  | 122  | 93.8 | 51.2 | 103  | 106  | 504  | 705   | 127  | 94.4 | 74.9 | 182  | 121  | 143  | 517  |
| 3-HPA         | ND    | ND   | ND   | ND   | ND   | ND   | ND   | ND   |
| <i>p</i> -COA | 248  | 804  | 71.9 | 1663 | 145  | 377  | 576  | 550  | 195  | 924  | 833  | 68.4 | 179  | 91.4 | 234  | 77.2 | 168  | 447   | 148  | 250  | 95.3 | 454  | 612  | 125  | 109  |
| FA            | 10.2 | 5.17 | ND   | 0.51 | ND   | ND   | ND   | ND   | ND    | ND   | ND   | ND   | ND   | ND   | ND   | ND   |
| DOPAC         | ND   | 0.53 | 0.40 | 0.66  | 0.91 | 1.21 | 0.40 | ND   | ND   | ND   | ND   |

$\alpha$ -HHA, HVA, HA, HST, HSD, NHSD, PIN, LQG, NRI, LIQ, FIS, NARG, GLB, FOR – not detected

1 – Radish – sprouts; 2 – Radish – roots; 3 – Radish – spots; 4 – Radish – leaves; 5 – Broccoli – sprouts; 6 – Broccoli – flowers; 7 – Brussels sprouts – leaves; 8 – Kale – leaves; 9 – Canola – roots; 10 – Canola – spots; 11 – Canola – leaves; 12 – Conehead cabbage – leaves; 13 – Kohlrabi – spots; 14 – Kohlrabi – edible spot; 15 – Kohlrabi – leaves; 16 – Green cabbage – leaves; 17 – Chinese cabbage – midvein; 18 – Chinese cabbage – leaves; 19 – Cauliflower – leaves; 20 – Cauliflower – head; 21 – Cauliflower – midvein; 22 – Pak Choi cabbage – leaves; 23 – Red cabbage – leaves; 24 – Italian cabbage – leaves; 25 – Kale – sprouts

**Table S2.** MRM transitions for selected polyphenols.

| Compound            | <i>Q1</i> <sup>a</sup> ( <i>m/z</i> ) | <i>Q3</i> <sup>b</sup> ( <i>m/z</i> ) |
|---------------------|---------------------------------------|---------------------------------------|
| <b>3,4-DHBA</b>     | 152.9                                 | 108.9                                 |
| <b><i>α</i>-HPA</b> | 193.9                                 | 72.8                                  |
| <b>DOPAC</b>        | 166.9                                 | 122.7                                 |
| <b>4-HBA</b>        | 136.9                                 | 93.0                                  |
| <b>CA</b>           | 178.9                                 | 135.0                                 |
| <b>HA</b>           | 177.9                                 | 133.7                                 |
| <b>3-HBA</b>        | 136.9                                 | 92.6                                  |
| <b>3-HPA</b>        | 150.9                                 | 107.0                                 |
| <b>HVA</b>          | 180.8                                 | 136.8                                 |
| <b>3,4-HPPA</b>     | 164.9                                 | 120.5                                 |
| <b>p-COA</b>        | 162.9                                 | 119.2                                 |
| <b>FA</b>           | 192.9                                 | 134.2                                 |
| <b>ERC</b>          | 595.2                                 | 286.9                                 |
| <b>LIQ</b>          | 417.2                                 | 255.0                                 |
| <b>RUT</b>          | 609.0                                 | 299.7                                 |
| <b>TAX</b>          | 303.2                                 | 284.7                                 |
| <b>BA</b>           | 120.9                                 | 76.8                                  |
| <b>NRI</b>          | 579.3                                 | 270.9                                 |
| <b>NARG</b>         | 579.2                                 | 270.9                                 |
| <b>HSD</b>          | 609.0                                 | 300.8                                 |
| <b>NHSD</b>         | 609.0                                 | 300.8                                 |
| <b>FIS</b>          | 284.9                                 | 134.8                                 |
| <b>LQG</b>          | 255.1                                 | 118.7                                 |
| <b>ERI</b>          | 287.0                                 | 150.7                                 |
| <b>QUE</b>          | 300.9                                 | 150.7                                 |
| <b>NAR</b>          | 270.9                                 | 150.7                                 |
| <b>HST</b>          | 300.9                                 | 163.7                                 |
| <b>FOR</b>          | 266.9                                 | 251.8                                 |
| <b>CHS (IS)</b>     | 252.9                                 | 143.0                                 |
| <b>PIN</b>          | 254.8                                 | 150.7                                 |
| <b>GLB</b>          | 323.2                                 | 201.3                                 |

<sup>a</sup> Q1, precursor ion<sup>b</sup> Q3, fragment ion
